# Supplementary material for: Histone methyltransferase Ezh2 coordinates mammalian axon regeneration via regulation of key regenerative pathways
Source: JCI journal article supplement (doi:10.1172/jci163145), 2023-11-28

# Full unedited gel for Figure 1A, Ezh2

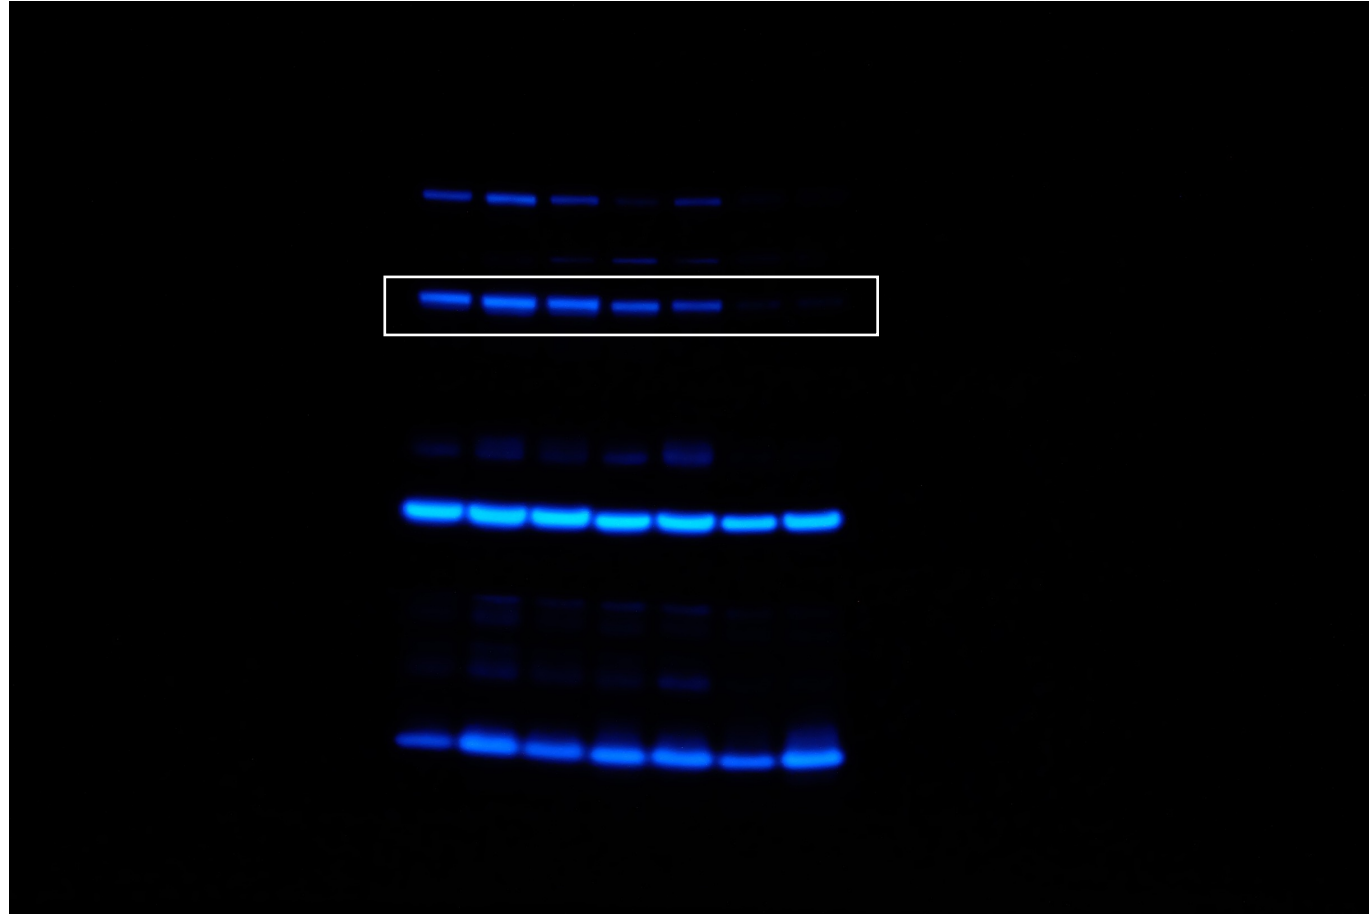

Full unedited gel for Figure 1A,  $\beta$ -actin

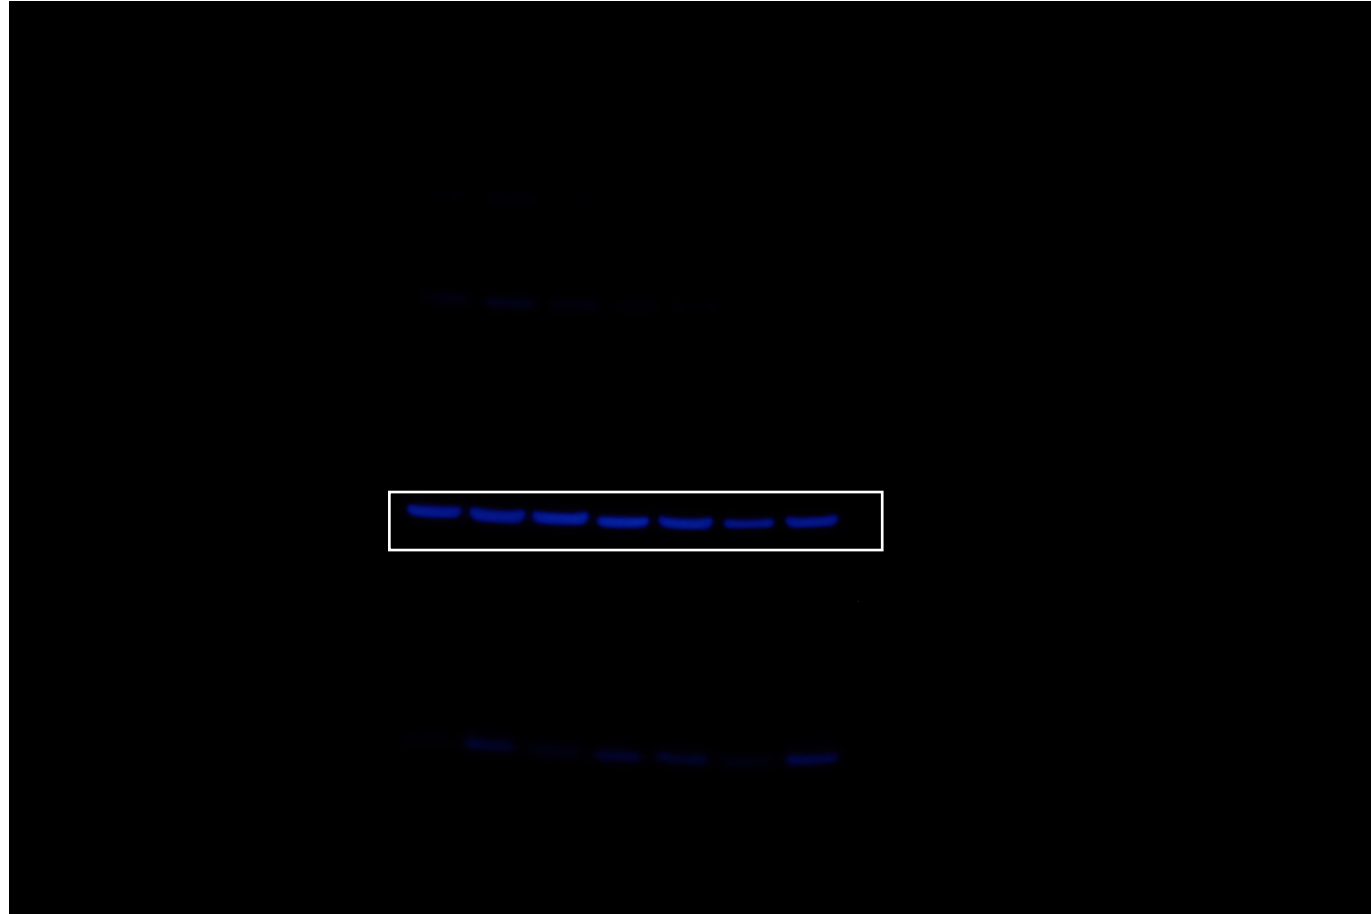

# Full unedited gel for Figure 1B, Ezh2

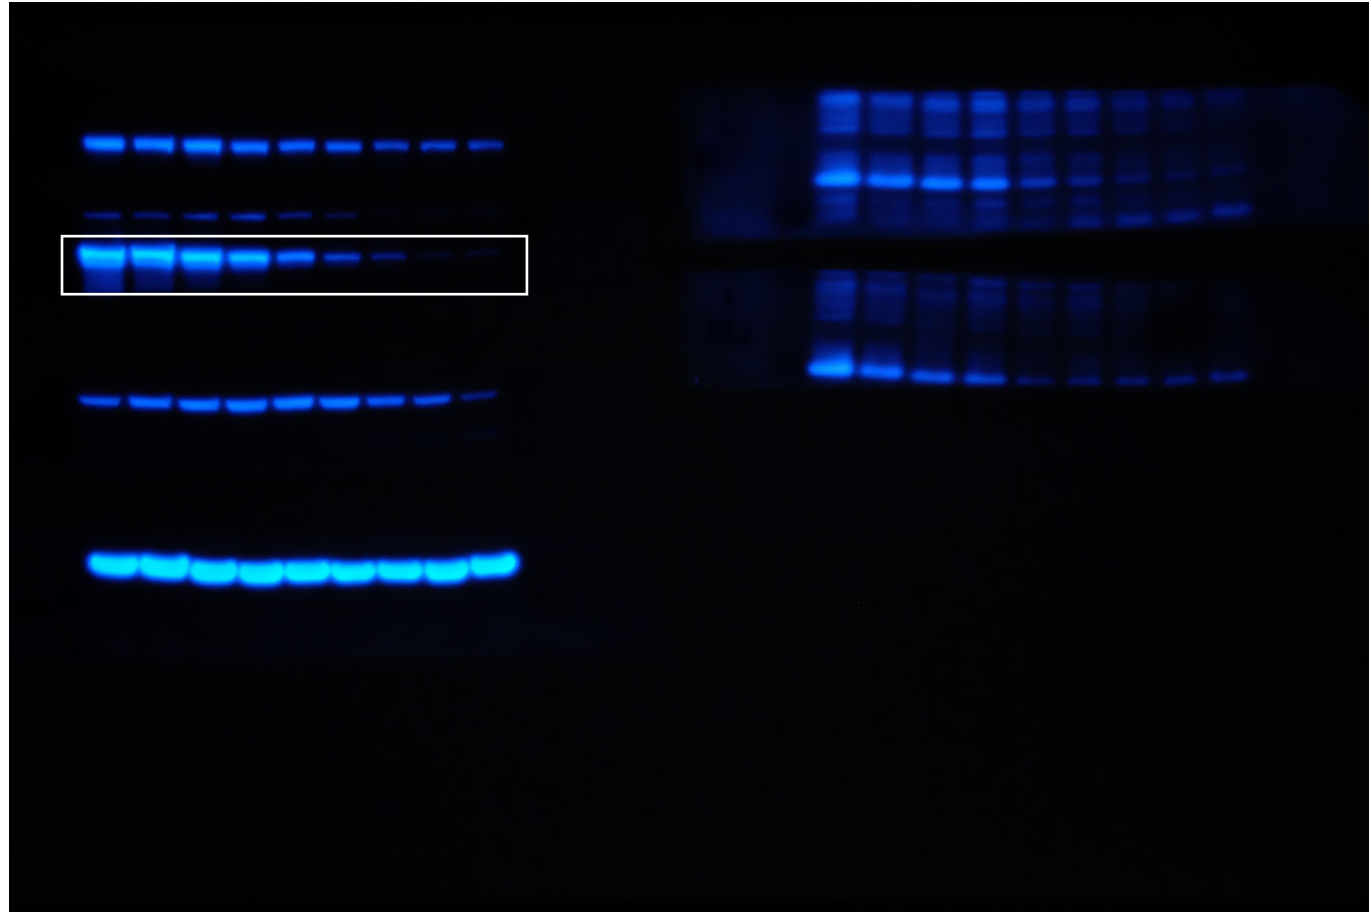

# Full unedited gel for Figure 1B, $\beta$ -actin

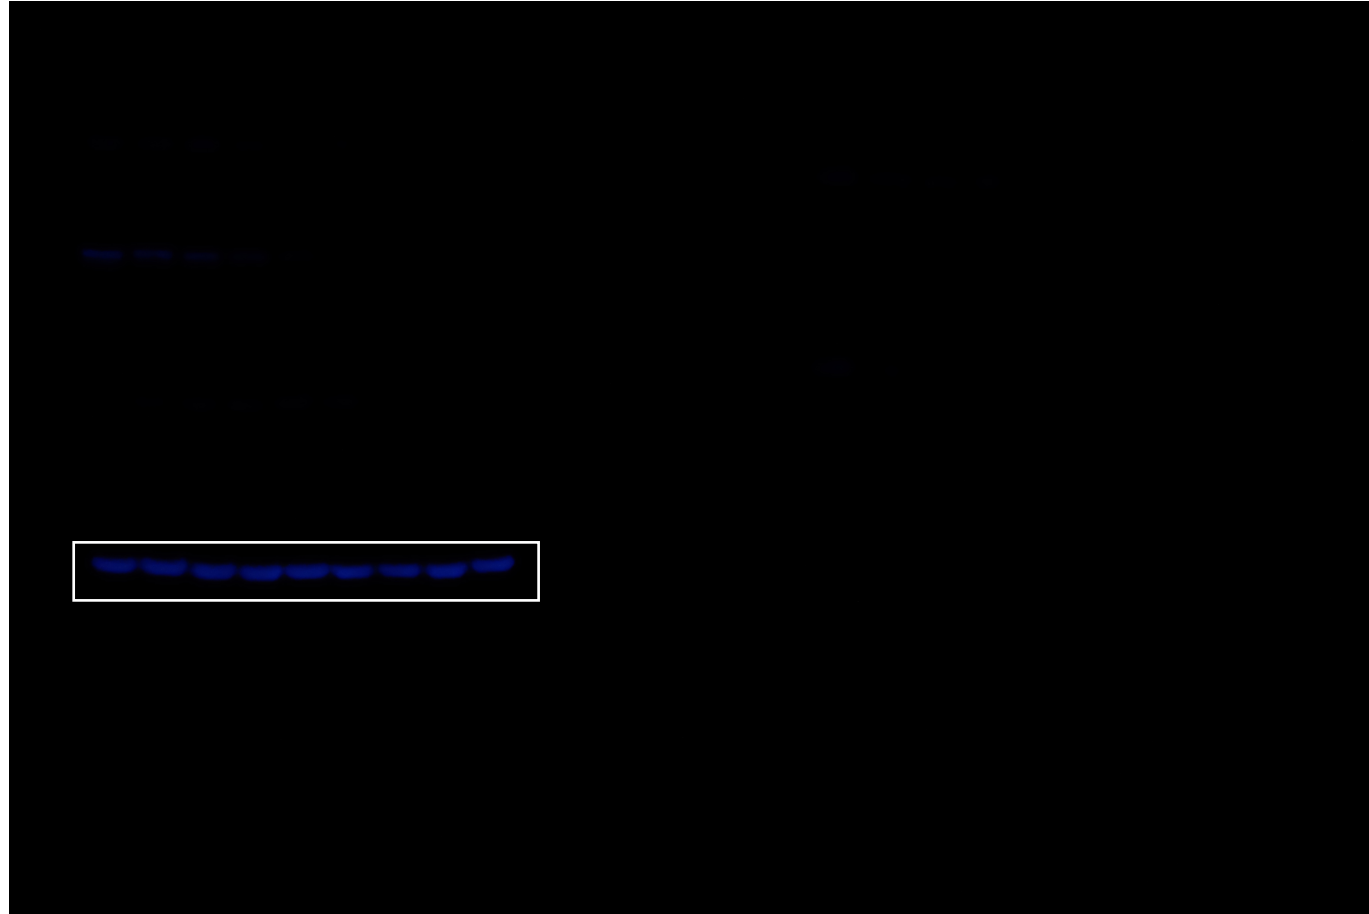

# Full unedited gel for Figure 1C, Ezh2

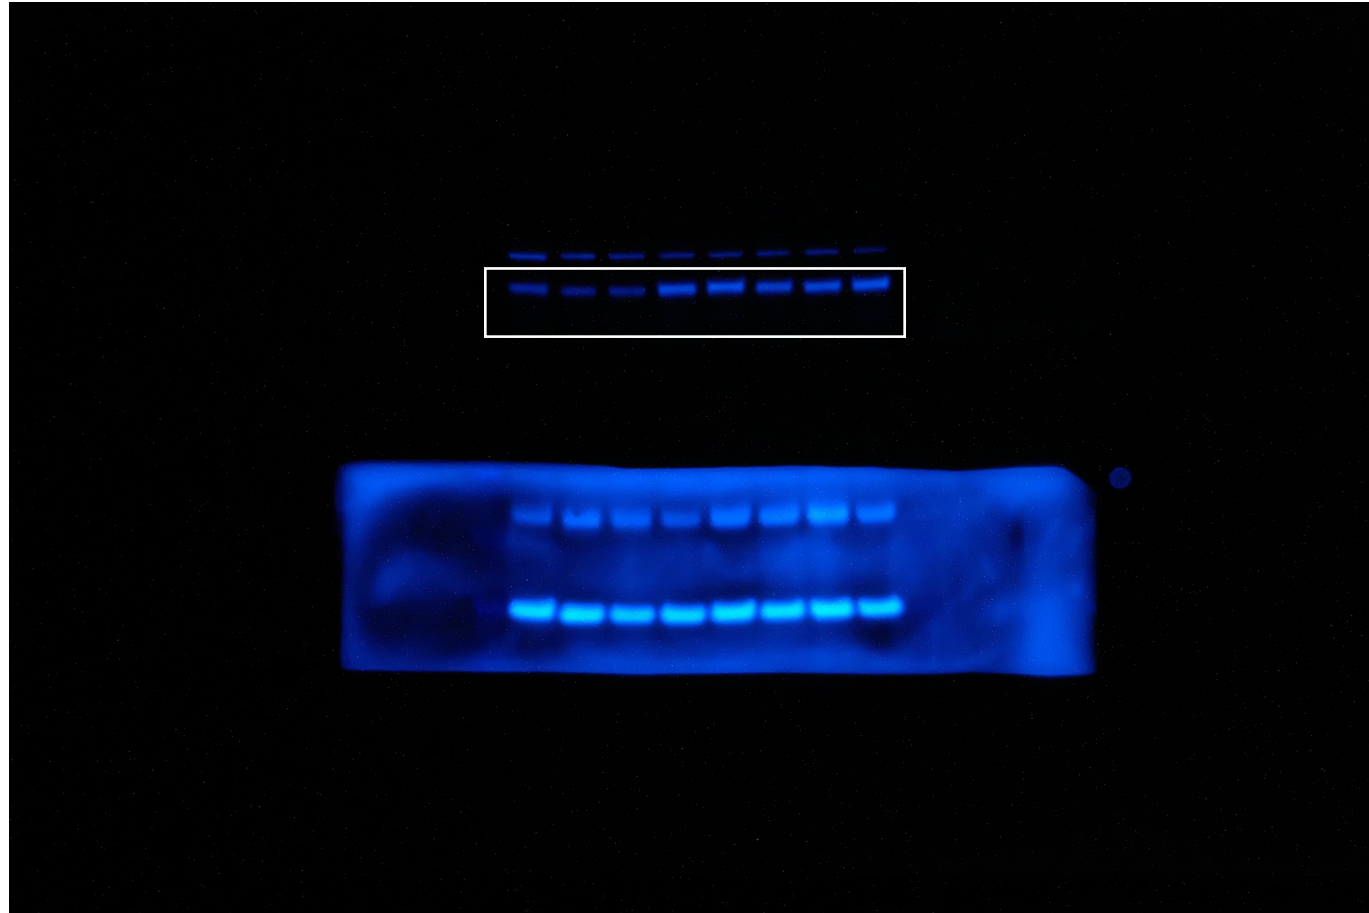

# Full unedited gel for Figure 1C, Gapdh

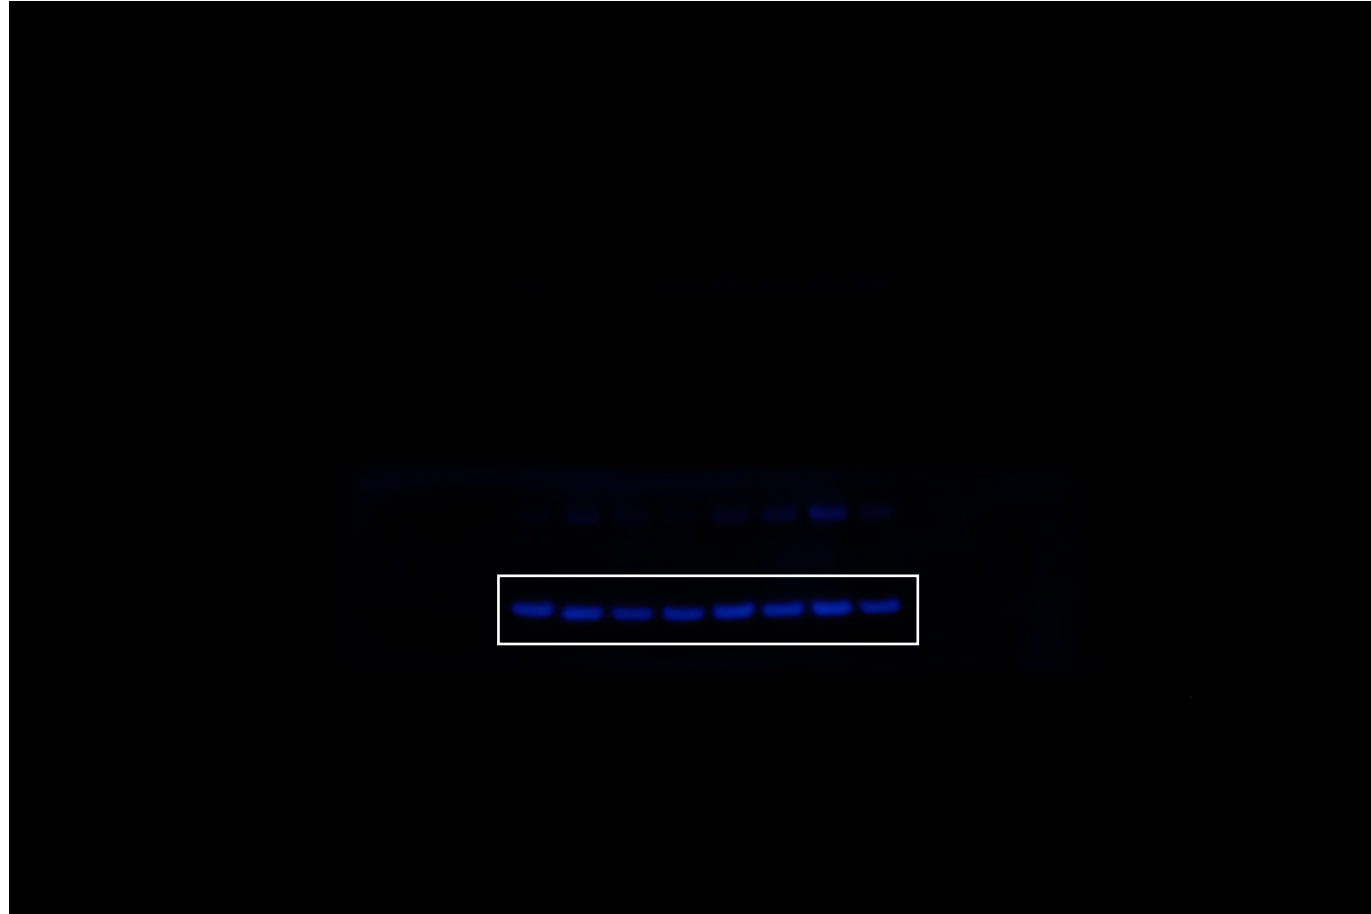

# Full unedited gel for Figure 2G, Ezh2

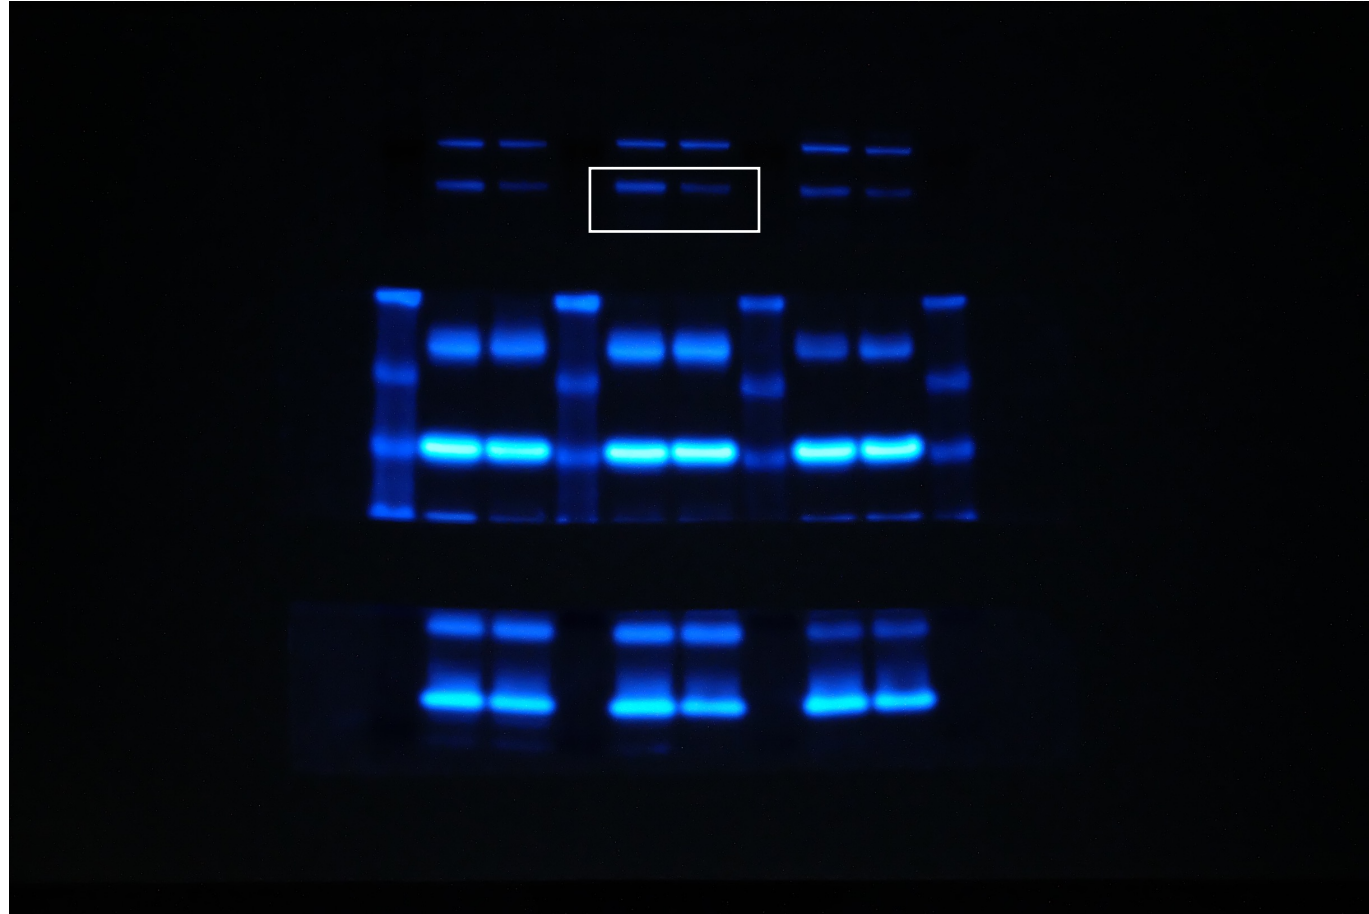

# Full unedited gel for Figure 2G, $\beta$ -actin

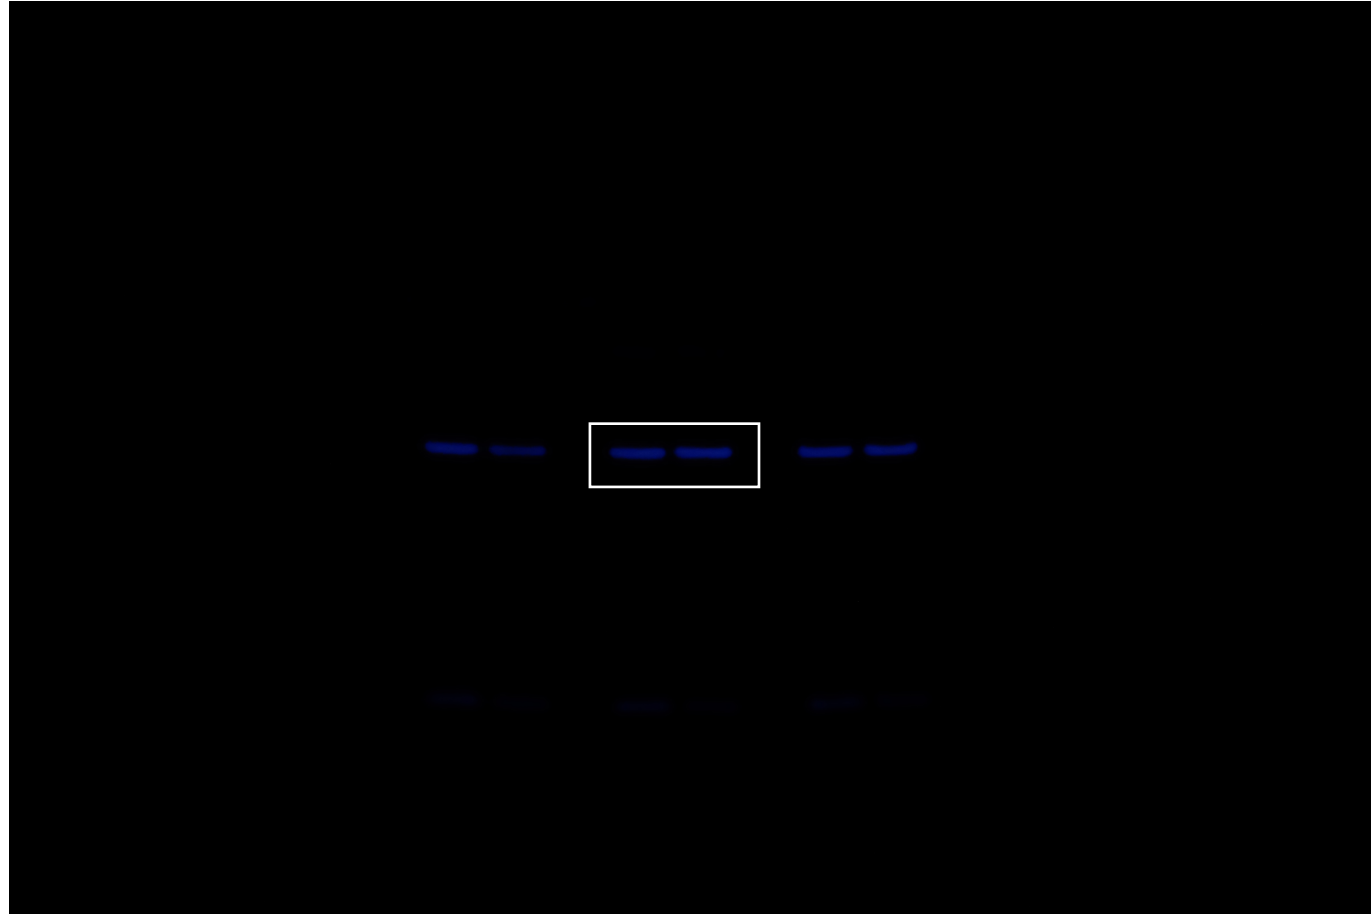



# Full unedited gel for Figure 2G, H3K27me3

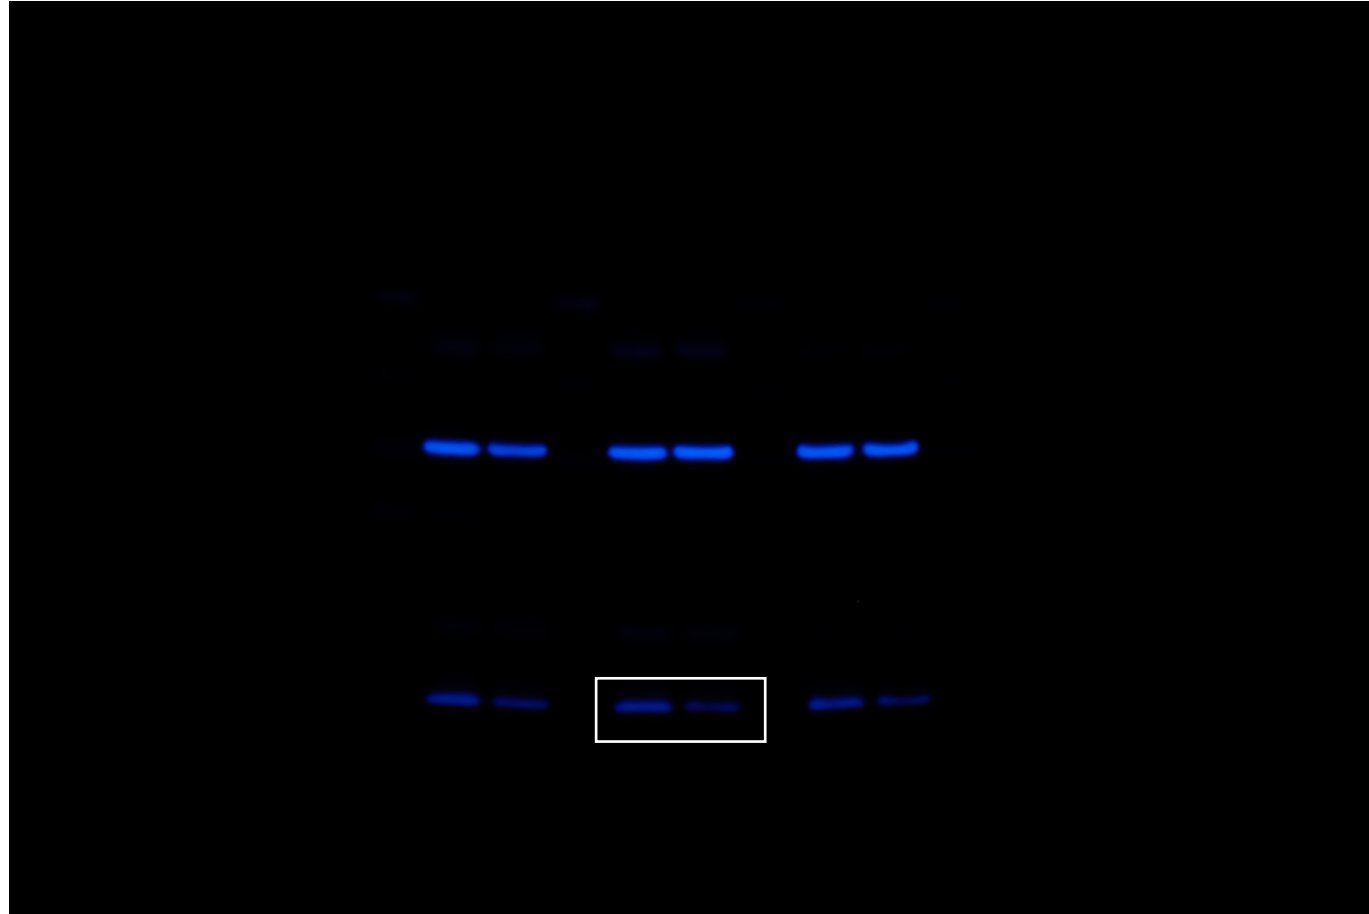

# Full unedited gel for Figure 2G, H3

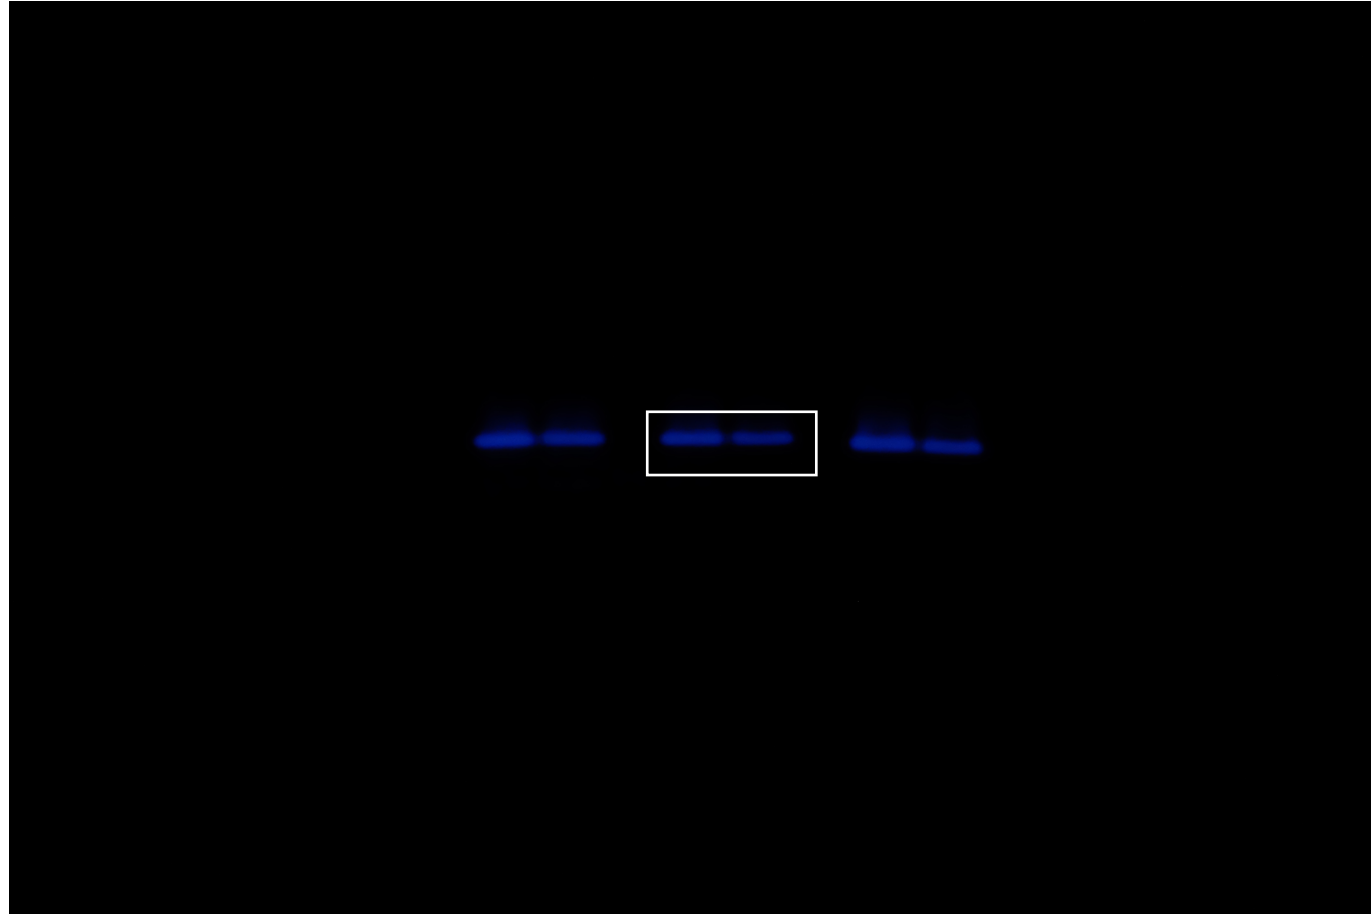

# Full unedited gel for Supplemental Figure 1A, Ezh1

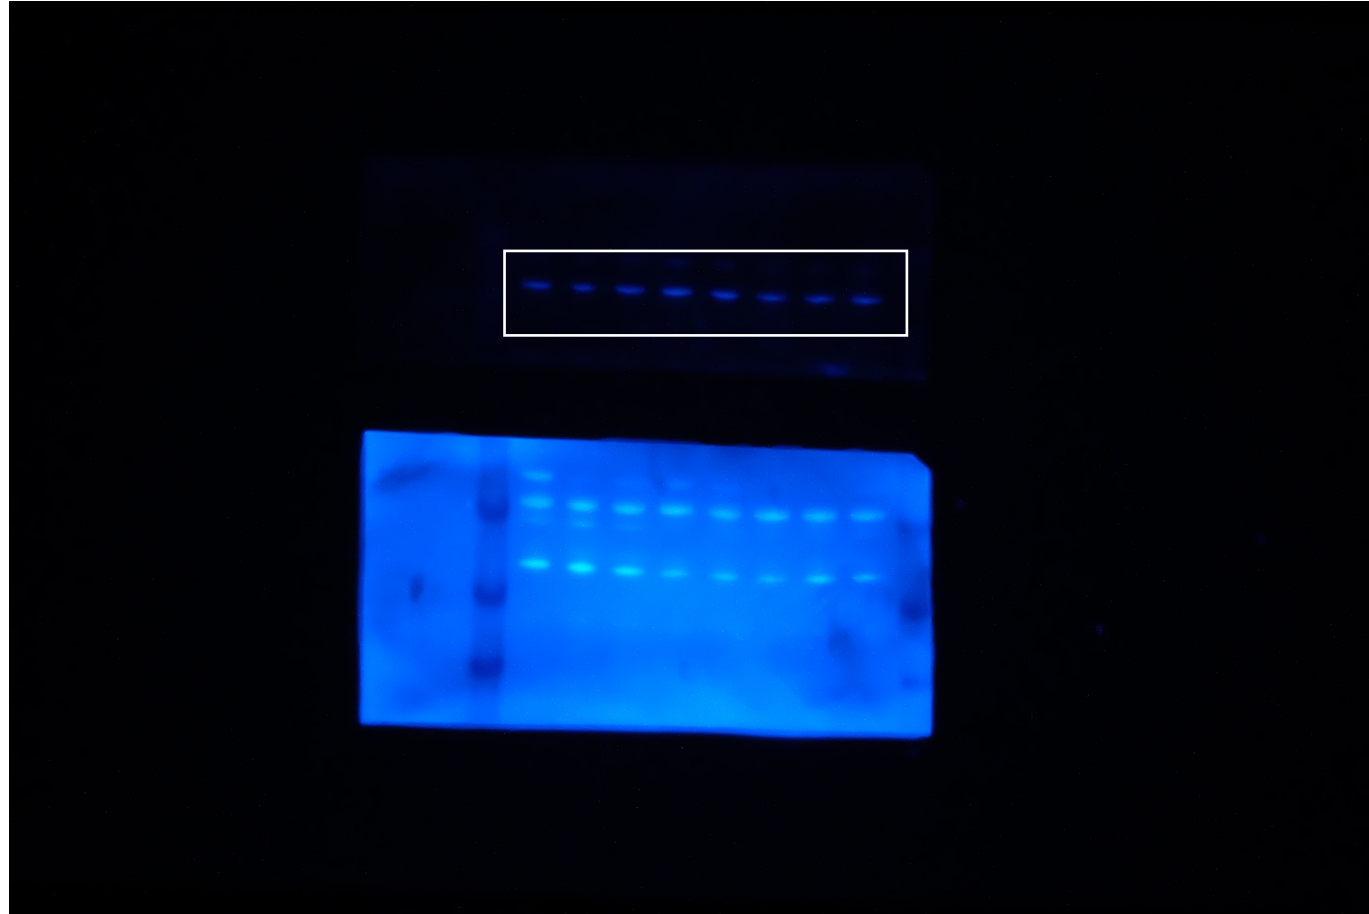

# Full unedited gel for Supplemental Figure 1A, Suz12

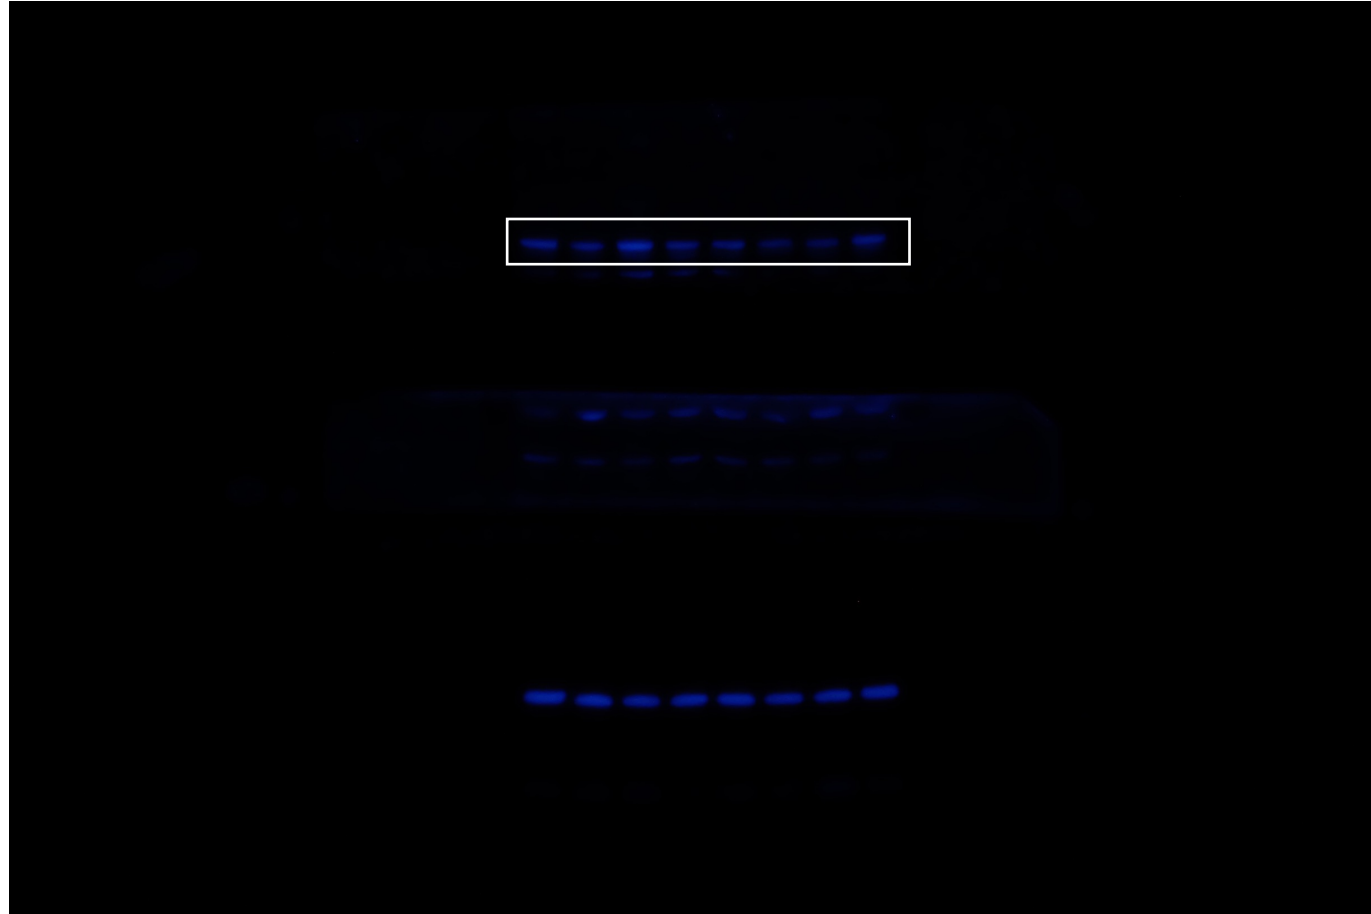

# Full unedited gel for Supplemental Figure 1A, Eed

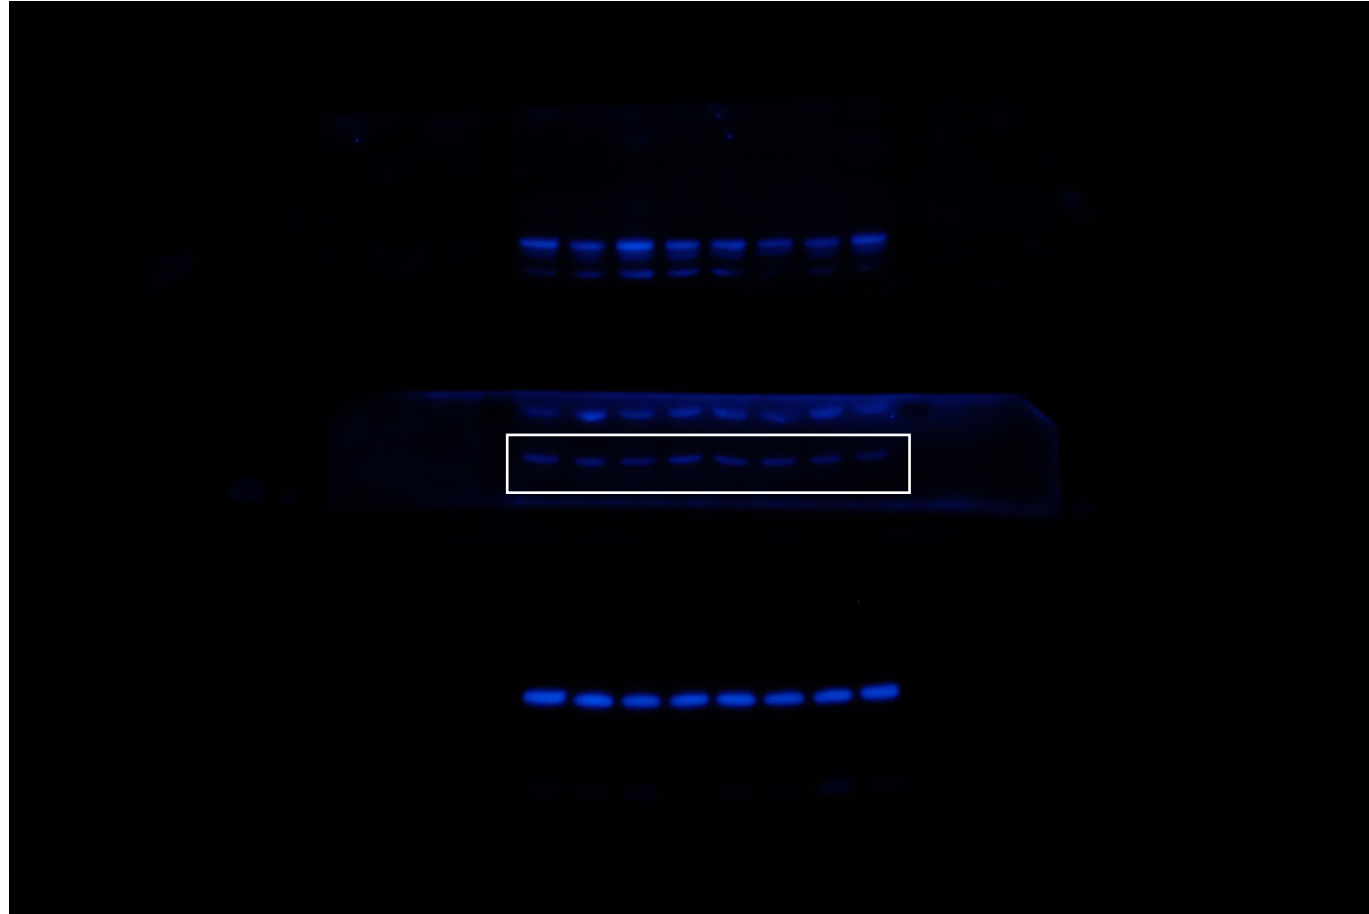

# Full unedited gel for Supplemental Figure 1A, Rbap46/48

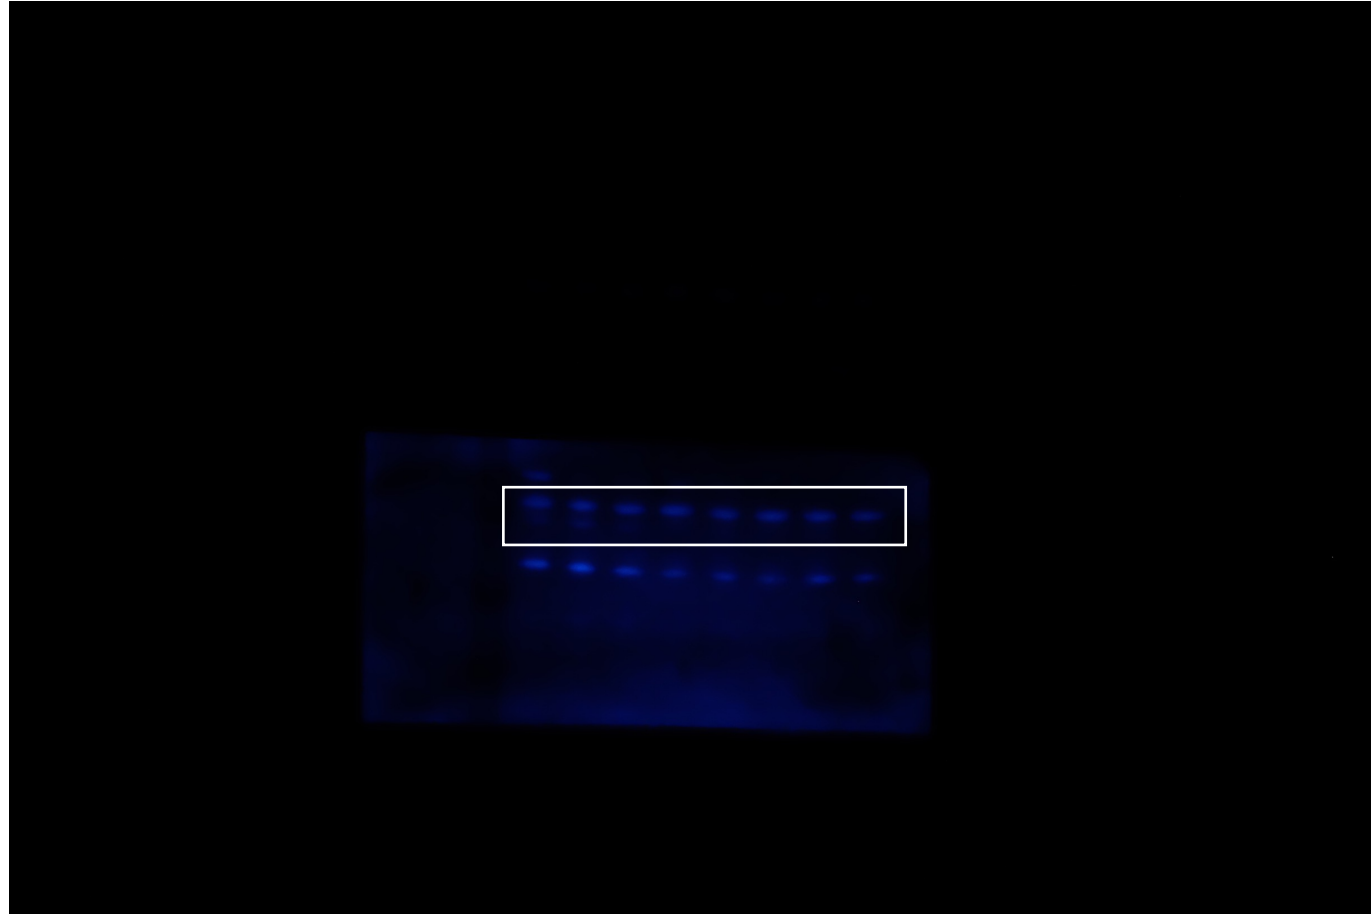

# Full unedited gel for Supplemental Figure 1, Gapdh

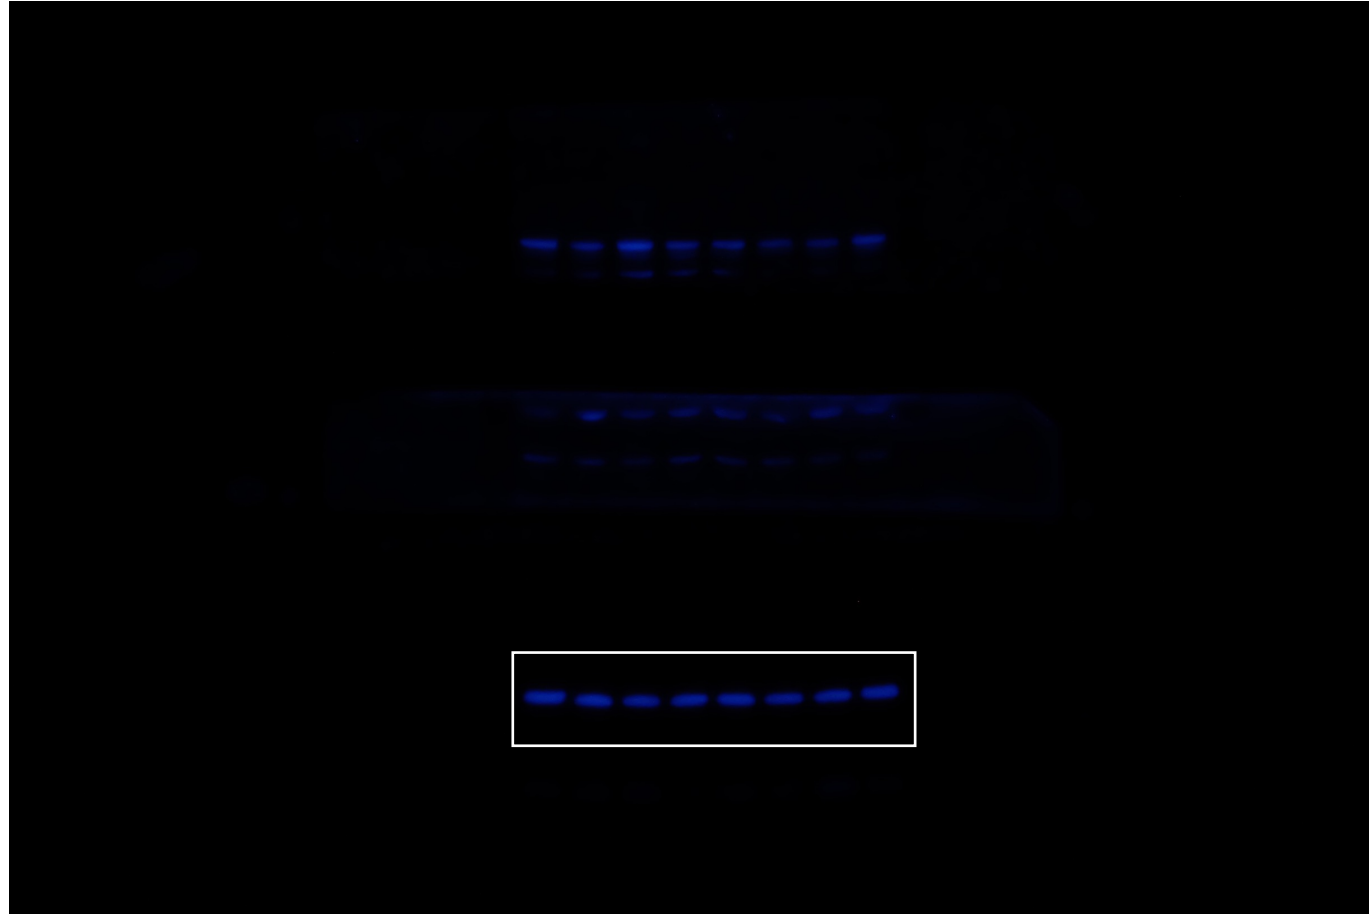

# Full unedited gel for Supplemental Figure 1F, Ezh2

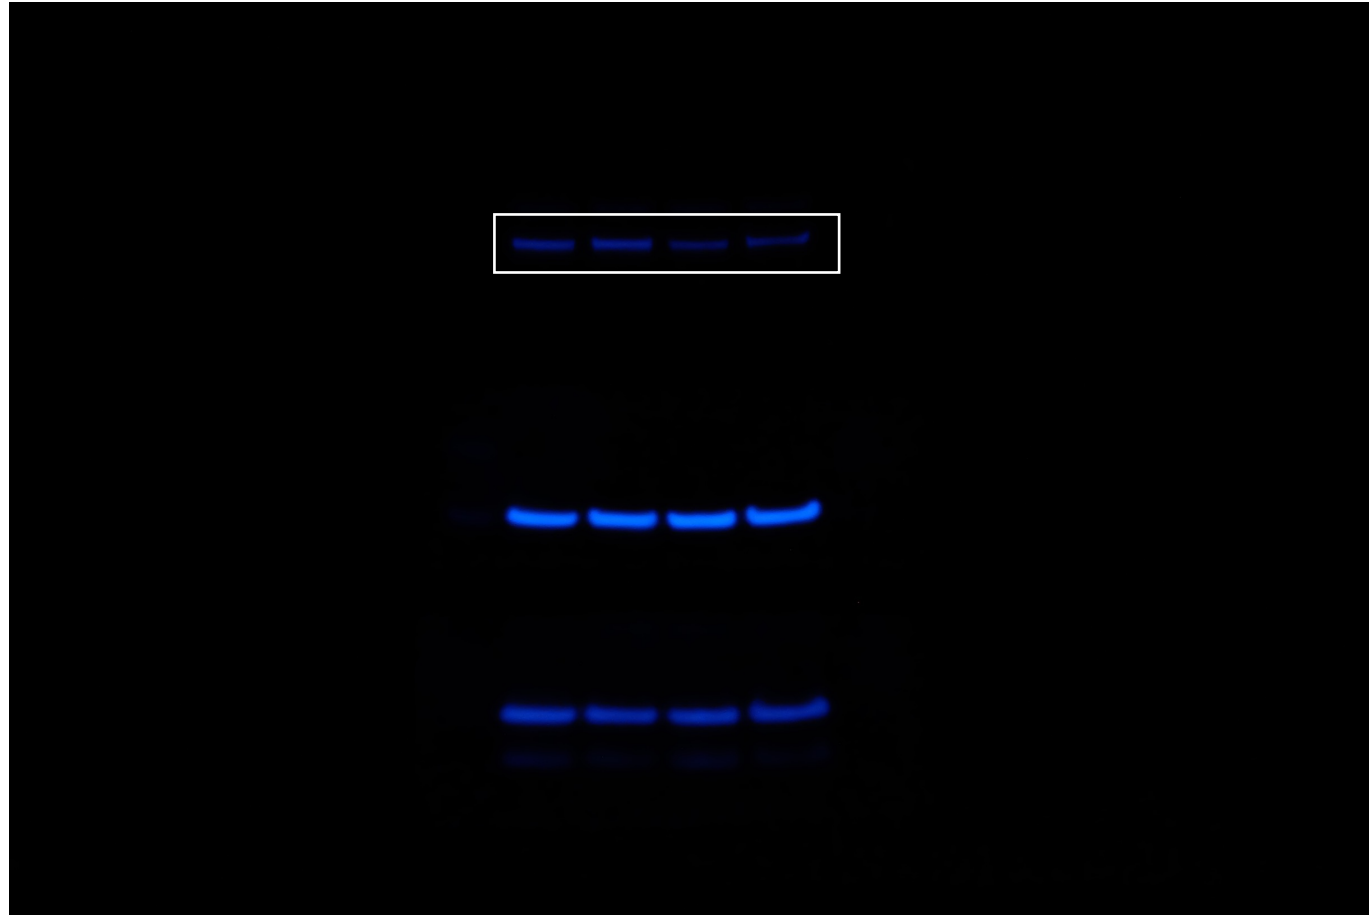



# Full unedited gel for Supplemental Figure 1F, Gapdh

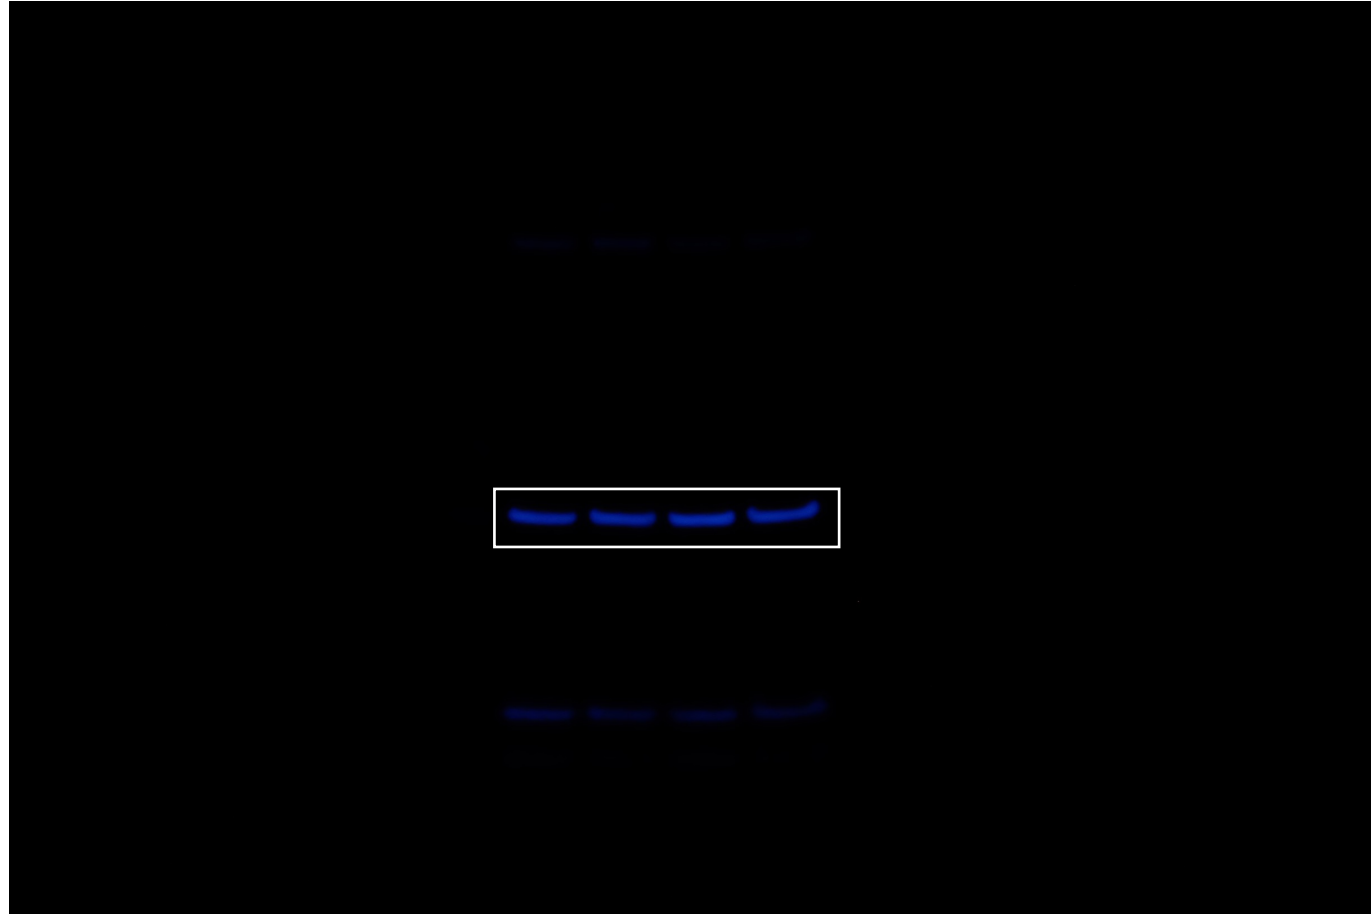

# Full unedited gel for Supplemental Figure 1G, Ezh2

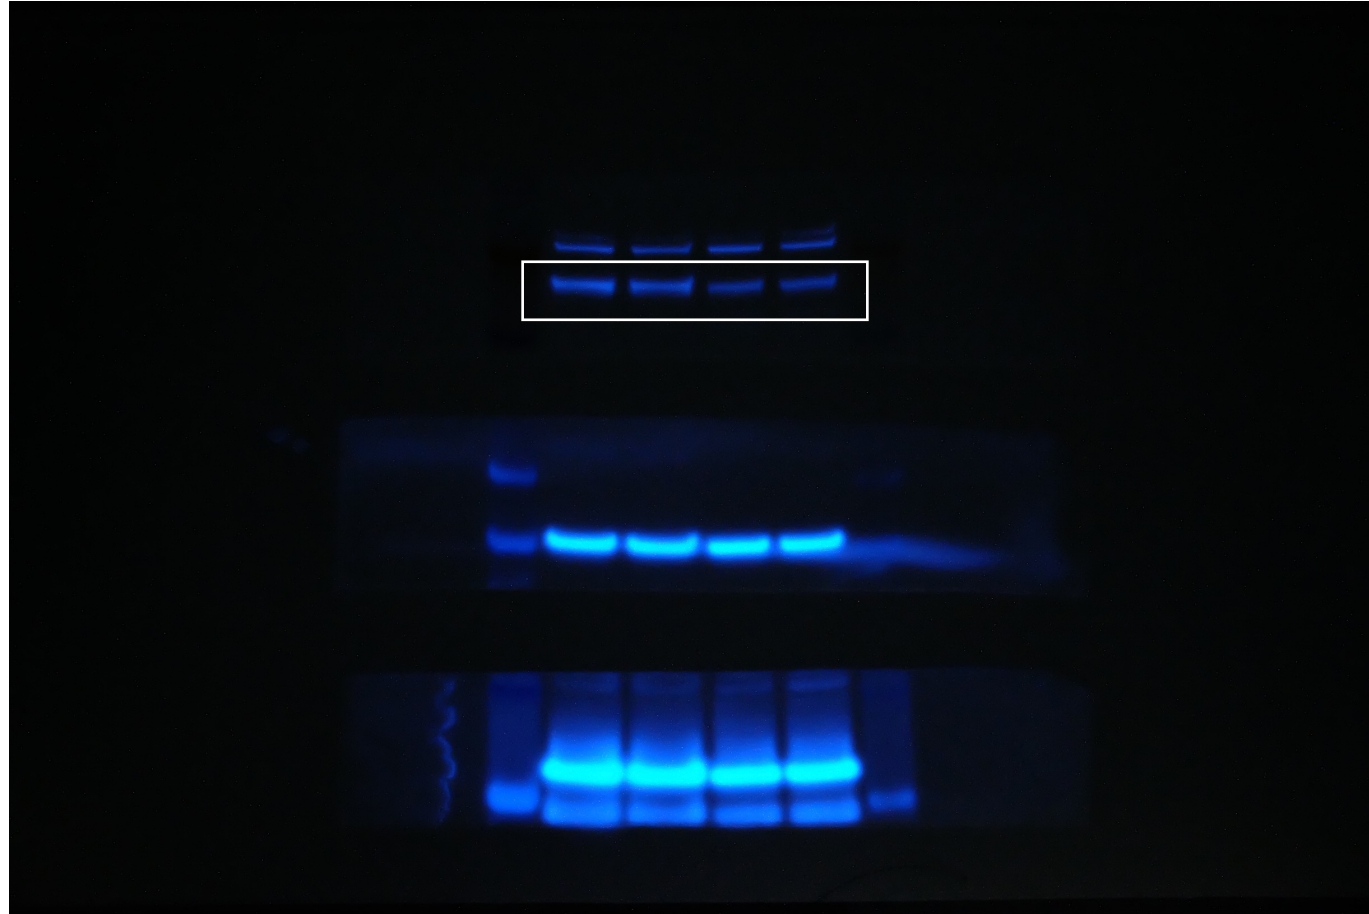

# Full unedited gel for Supplemental Figure 1G, Gapdh

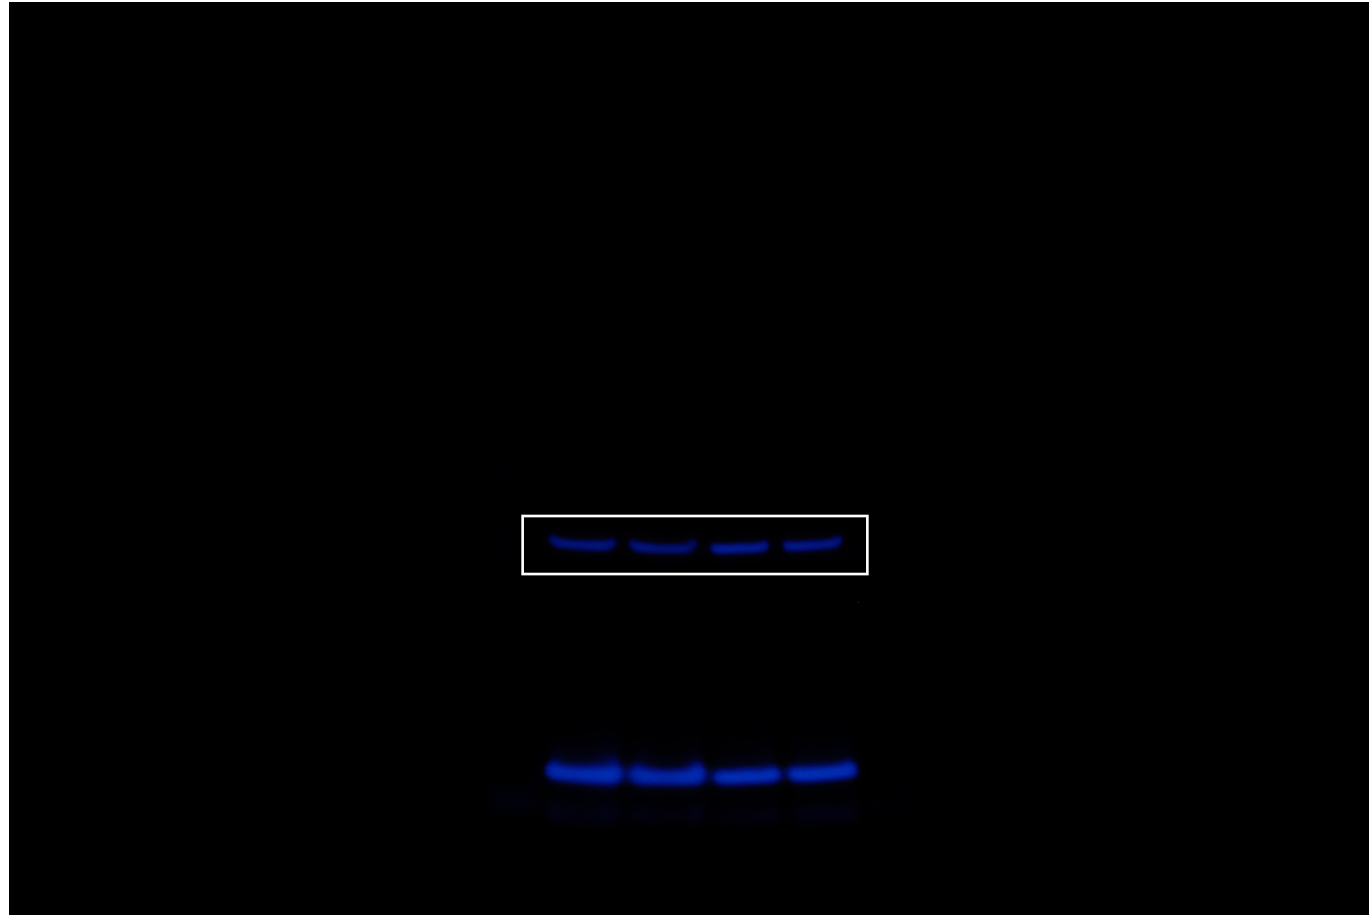

# Full unedited gel for Supplemental Figure 3A, Ezh2

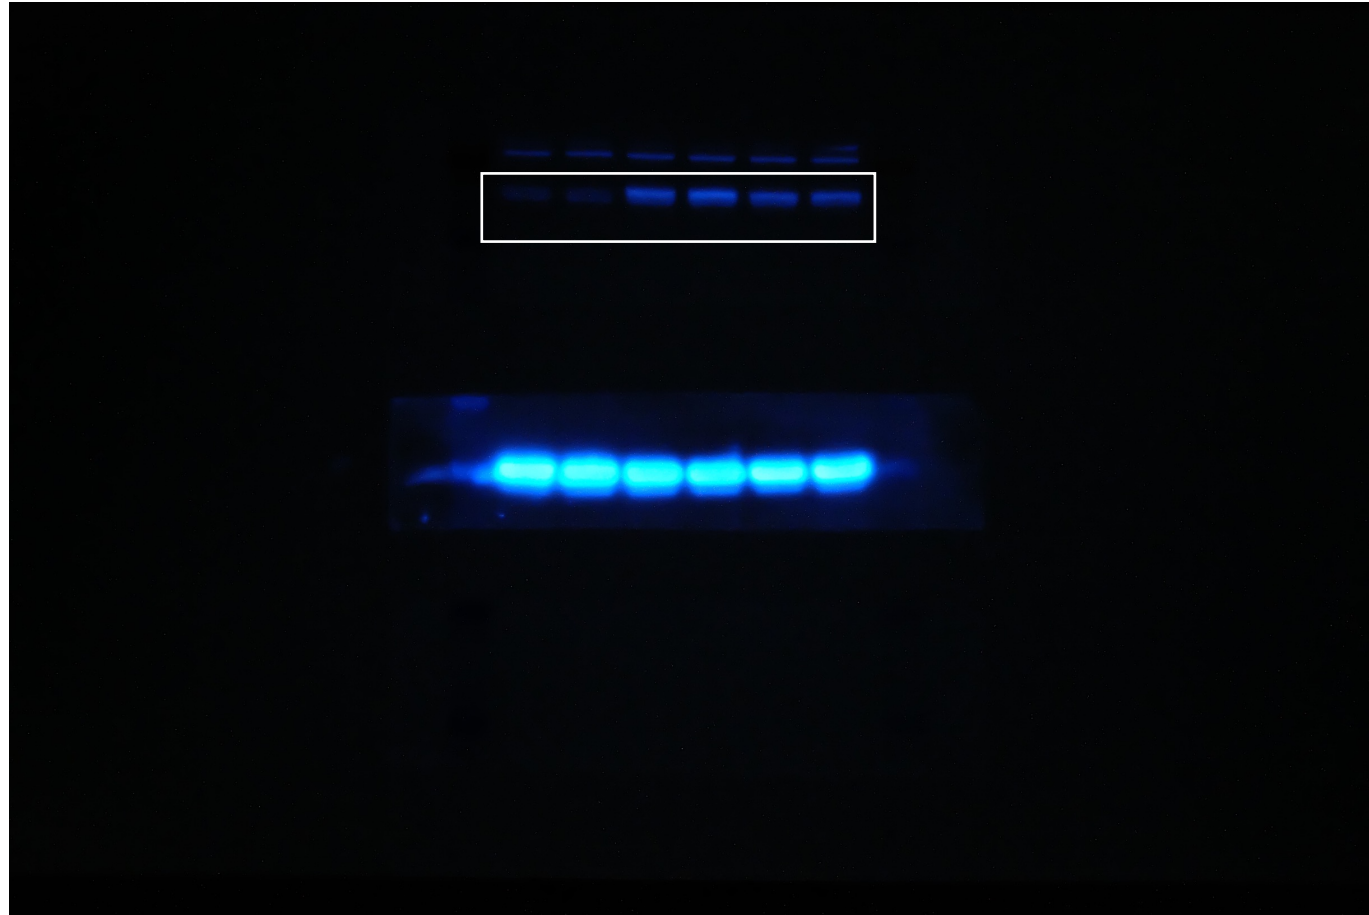

# Full unedited gel for Supplemental Figure 3A, Gapdh

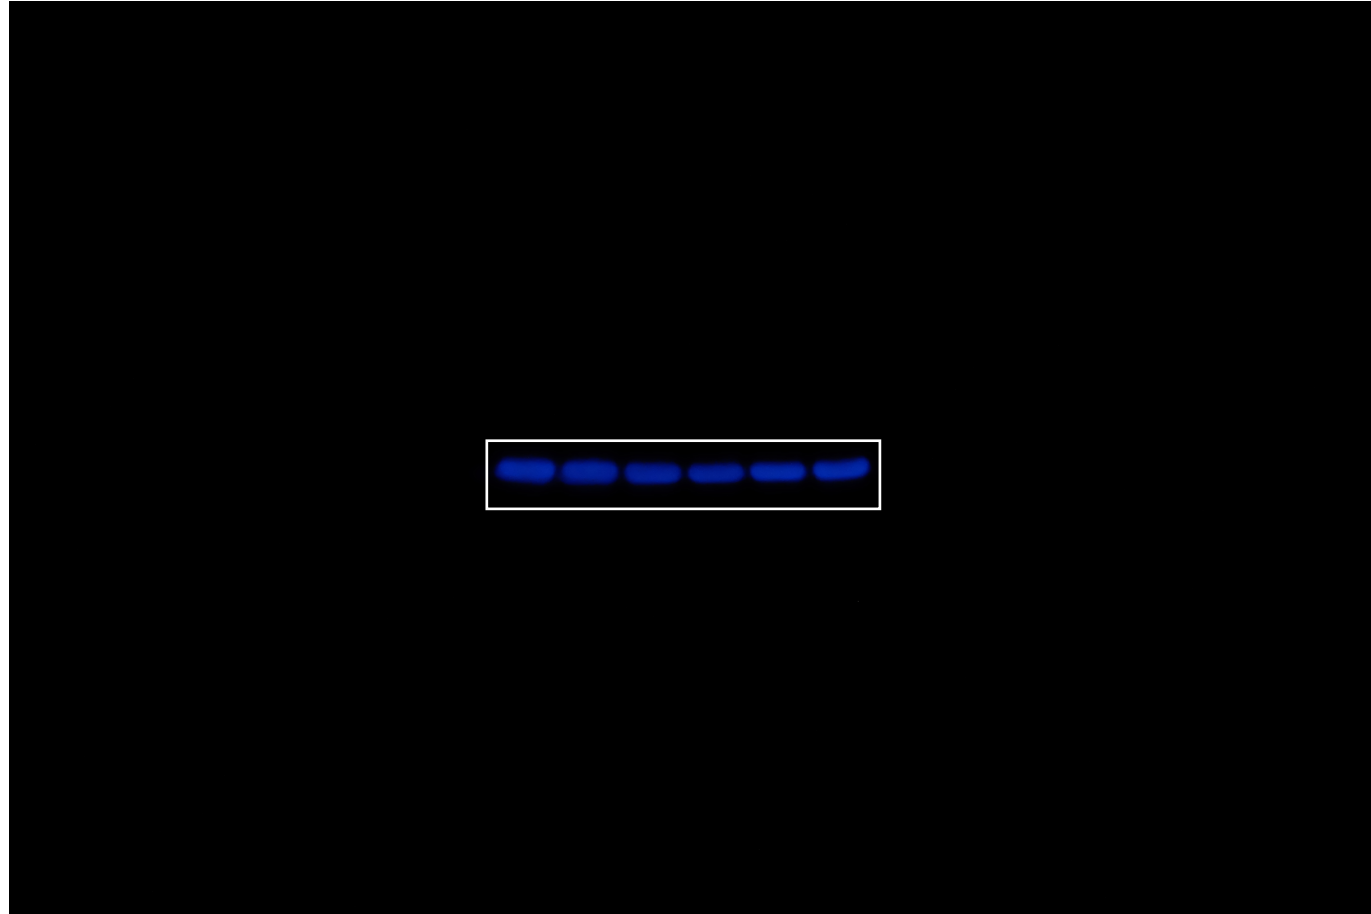

# Full unedited gel for Supplemental Figure 3B, Ezh2

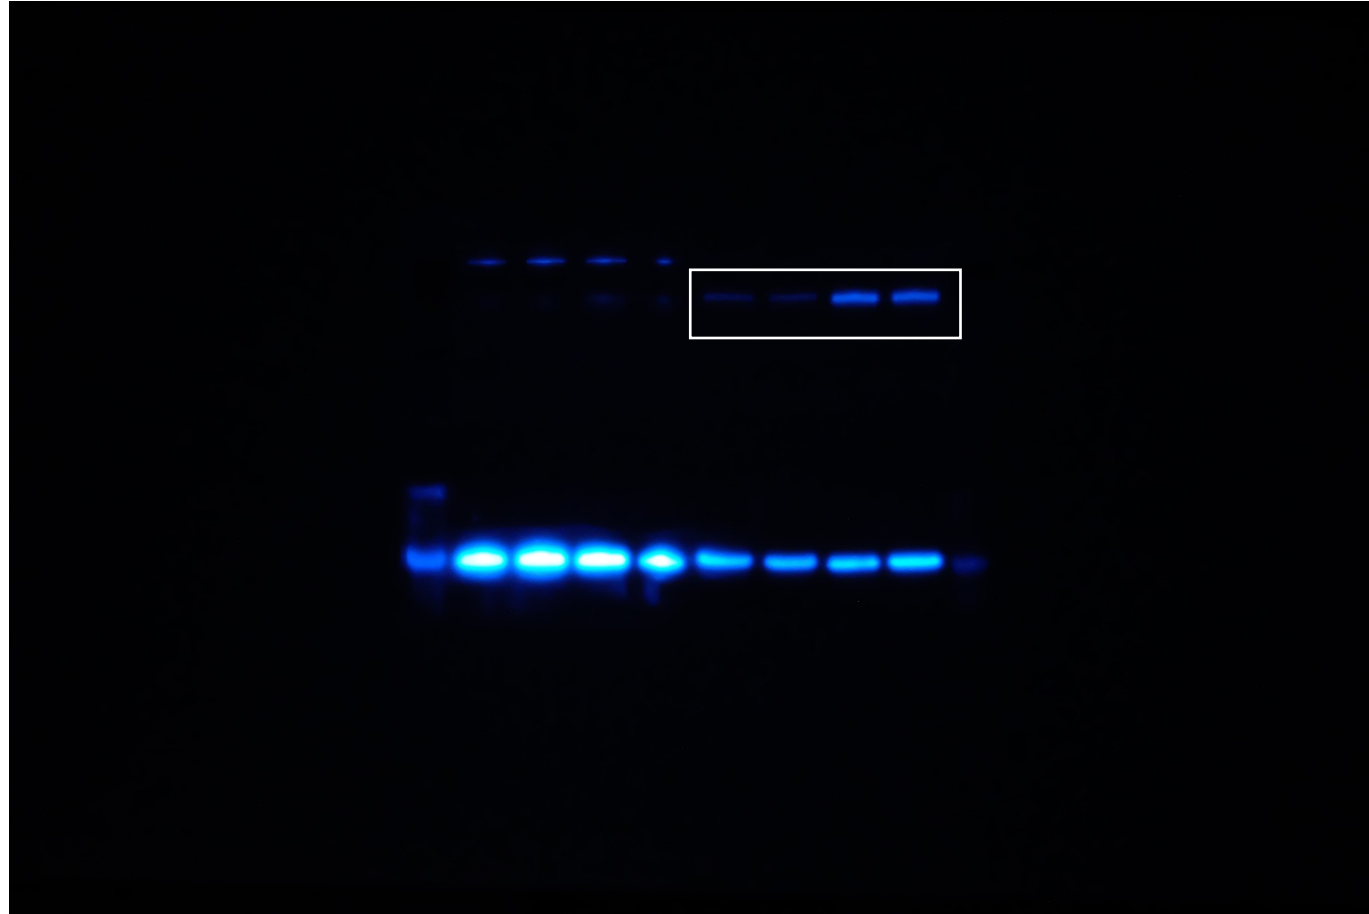

# Full unedited gel for Supplemental Figure 3B, Gapdh

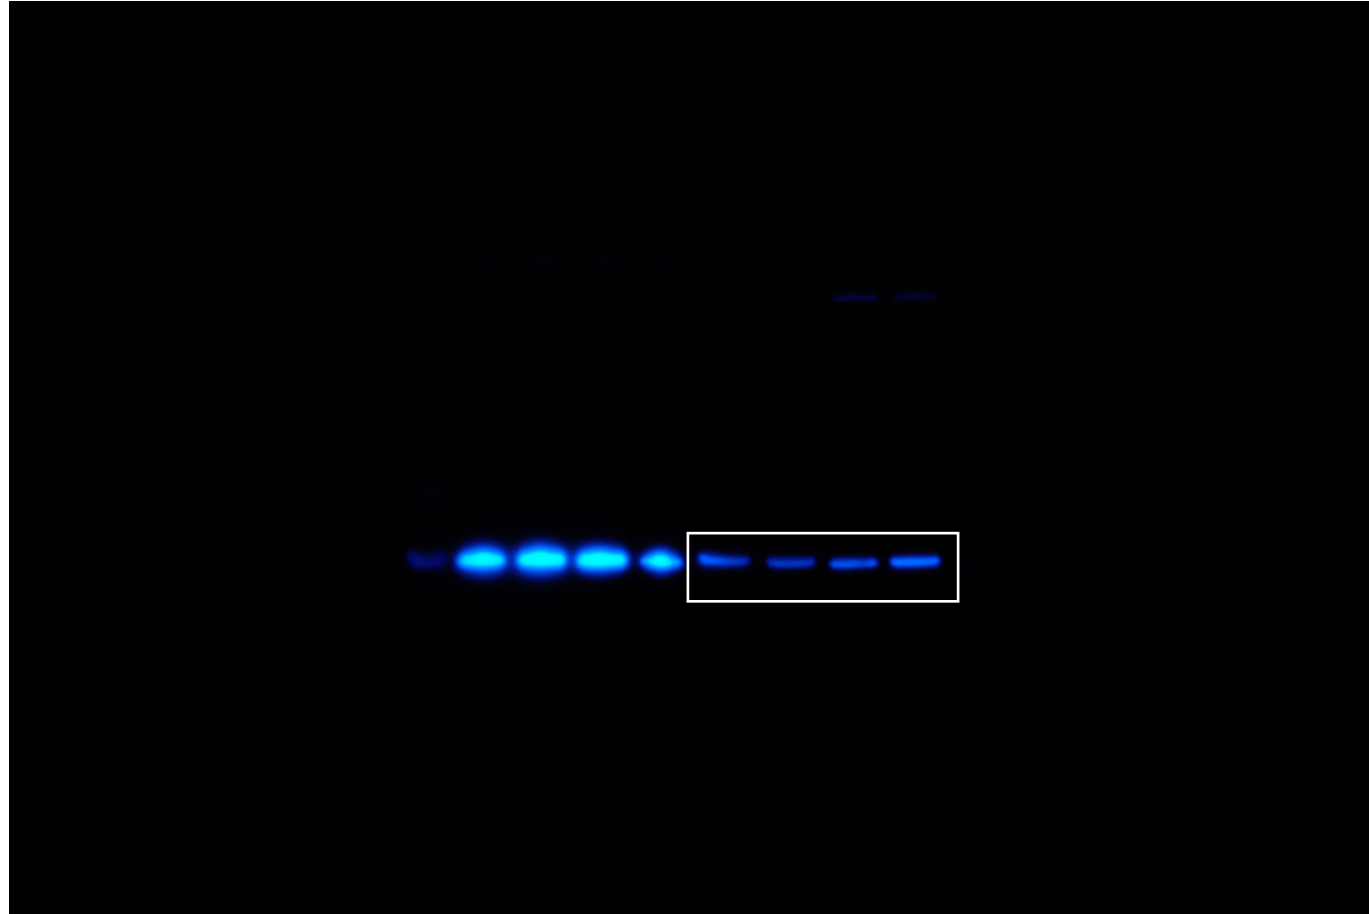

Supplement: sd2 [file 2]
